# Supplementary material for: Nutrient-Dependent Mitochondrial Fission Enhances Osteoblast Function
Source: MDPI journal article supplement (doi:10.3390/nu15092222), 2023-05-08
Supplement: s1 [file s1]

**Supplementary Table S1.** Primers used for qPCR analysis

| <b>Gene</b>    | <b>Primer Fwd (5'-3')</b>  | <b>Primer Rev (5'-3')</b> |
|----------------|----------------------------|---------------------------|
| <i>18s</i>     | GCTCTAGAATTACCACAGTTATCCAA | AAATCAGTTATGGTTCCTTTGGTC  |
| <i>Acadl</i>   | GACCTCTCTACTCACTTCTCCAG    | TCTTTTCCTCGGAGCATGACA     |
| <i>Alp</i>     | CGGATCCTGACCAAAAACC        | TCATGATGTCCGTGGTCAAT      |
| <i>Atp6</i>    | CAACCGTCTCCATTCTTTCC       | TCATGTTCGTCCTTTTGGTG      |
| <i>Bglap</i>   | TGAGGACCATCTTTCTGCTCA      | TGGACATGAAGGCTTTGTCA      |
| <i>Cd36</i>    | TTGAAAAGTCTCGGACATTGAG     | TCAGATCCGAACACAGCGTA      |
| <i>Col1α1</i>  | CCGCTGGTCAAGATGGTC         | CTCCAGCCTTTCAGGTTCT       |
| <i>Cpt1α</i>   | TCTGCCATCTTGAGTGGTGA       | GACTCCGCTCGCTCATTC        |
| <i>Cpt2</i>    | TCCCAATGCCGTTCTCAAAAT      | CAGCACAGCATCGTACCCA       |
| <i>Mtco2</i>   | CCTCCACTCATGAGCAGTCC       | GAATAACCCTGGTCGGTTTG      |
| <i>Nd1</i>     | GTGAGTGATAGGGTAGGTGCA      | AACACTCCTCGTCCCCATTC      |
| <i>Pgc1α</i>   | TATGGAGTGACATAGAGTGTGCT    | TCAAGAGCTGGTCCTTGTACC     |
| <i>RNase P</i> | CTGACCACACGAGCTGGTAGAA     | GCCTACACTGGAGTCGTGCTACT   |
| <i>Runx2</i>   | GCCCAGGCGTATTTTCAGAT       | TGCCTGGCTCTTCTTACTGAG     |

**Supplementary Table S2.** MTT test metabolic activity (Fold vs T0) over time.

|                     | MTT test Metabolic Activity (Fold±SD vs Time 0) |                     |                   |                   |                   |                    |
|---------------------|-------------------------------------------------|---------------------|-------------------|-------------------|-------------------|--------------------|
| <i>Time (hours)</i> | <i>G (5.5 mM)</i>                               | <i>G+PA 12.5 μM</i> | <i>G+PA 25 μM</i> | <i>G+PA 50 μM</i> | <i>G+PA 75 μM</i> | <i>G+PA 100 μM</i> |
| 24                  | 1.16±0.12                                       | 1.10±0.09           | 1.57±0.10         | 1.02±0.10         | 1.14±0.10         | 0.91±0.10          |
| 48                  | 3.10±1.05                                       | 2.30±0.99           | 3.97±1.66*        | 2.82±0.73         | 2.97±0.94         | 2.72±0.82          |
| 72                  | 4.30±1.25                                       | 4.42±1.63           | 6.07±0.99**, ##   | 3.67±0.87         | 3.53±1.03         | 3.57±1.76          |
| 96                  | 5.50±0.58                                       | 5.10±1.06           | 6.50±0.80*, ##    | 4.19±0.57*        | 4.20±0.79*        | 3.72±0.61*         |

\* $p<0.05$ , \*\* $p<0.01$  vs G

## $p<0.01$  vs G+PA50 μM, G+PA75uM, G+PA100 μM
