# Supplementary material for: Nutrient-Dependent Mitochondrial Fission Enhances Osteoblast Function
Source: MDPI journal article supplement (doi:10.3390/nu15092222), 2023-05-08
Supplement: s1 [file s1]

# Supplementary Figures and Legends

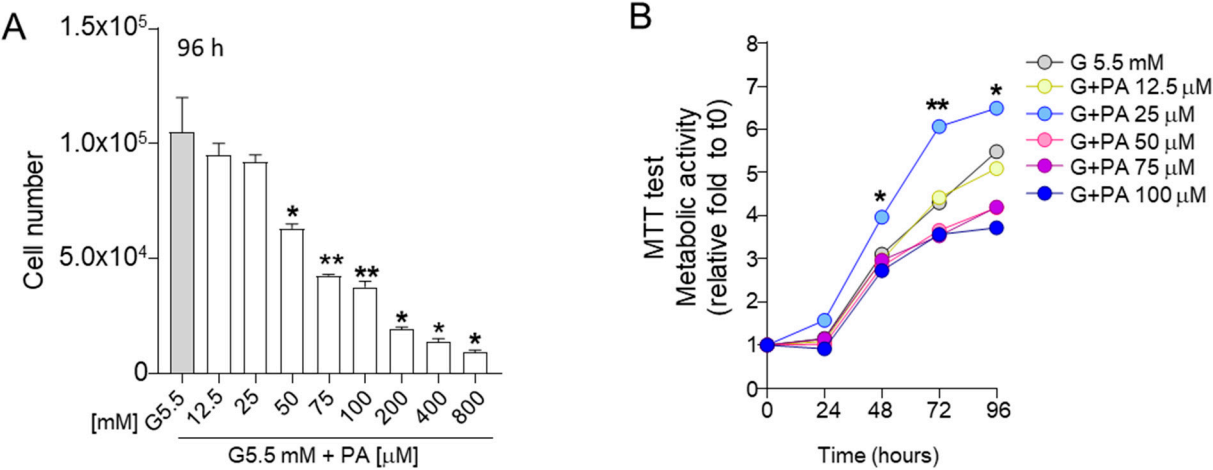

**Supplementary Figure S1.** Effect of PA on MC3T3-E1 cell viability and metabolic activity by MTT Test over time. (A) MC3T3-E1 cells were treated for 96 h with Glucose 5.5 mM (G) plus different PA concentrations ranging from 12.5  $\mu$ M to 800  $\mu$ M. Cell counting is reported ( $n = 3$  per group). \*  $p < 0.05$ , \*\*  $p < 0.01$  as compared to G treatment. (B) MTT assay metabolic activity relative fold to t0, over time ( $n = 6$  per group). \*  $p < 0.05$ , \*\*  $p < 0.01$  as compared to G treatment at indicated time points. See Supplementary Table S2 for detailed analysis.

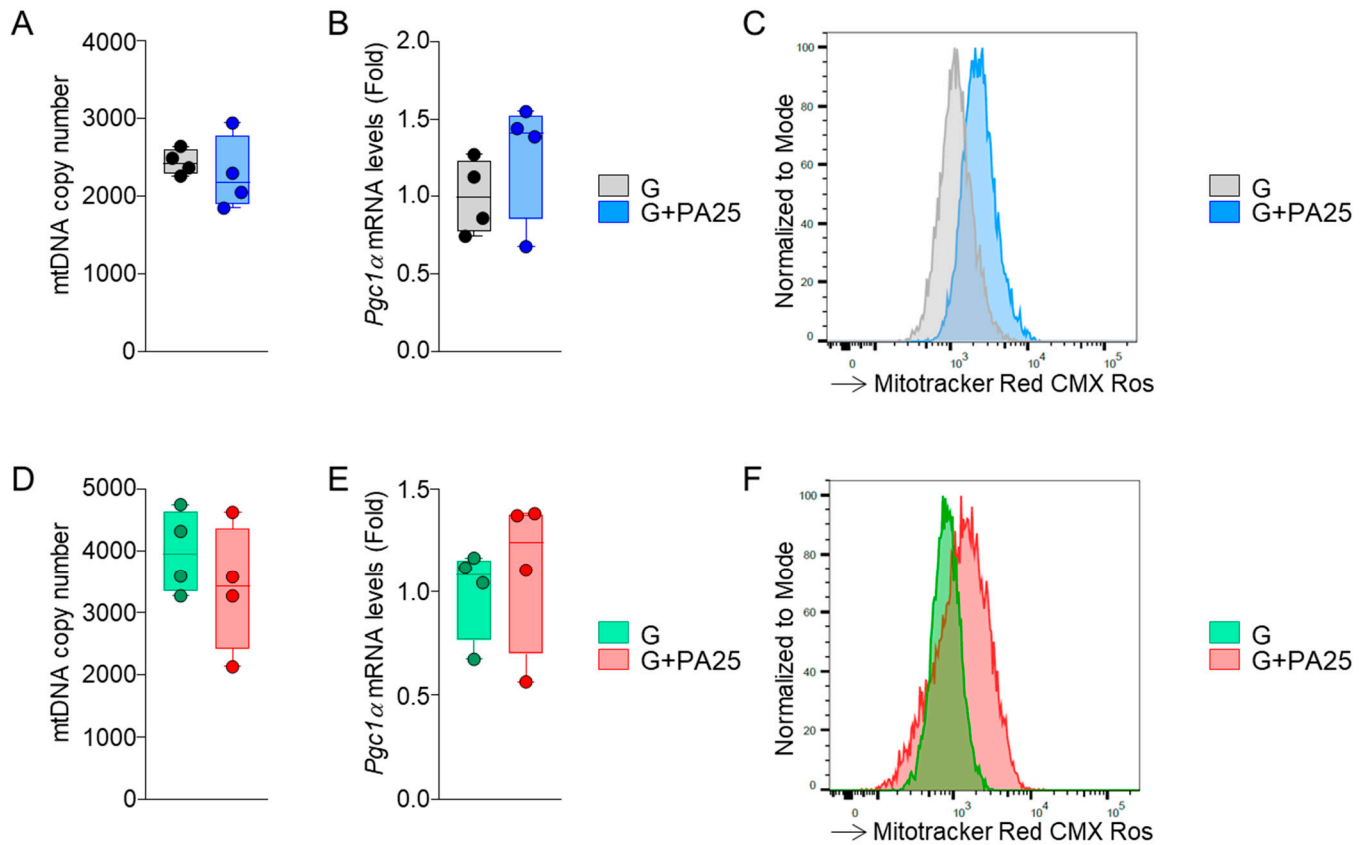

**Supplementary Figure S2.** Effect of G+PA25 on mitochondrial mass and membrane potential in osteogenic-induced cells. (A) mtDNA copy number evaluation ( $n = 4$  per group), (B) *Pgc1 $\alpha$*  mRNA levels (Fold) ( $n = 4$  per group) and (C) representative histograms relative to Mitotracker RED CMXRos fluorescence intensity reported in Figure 2I, in MC3T3-E1 cell line. (D) mtDNA copy number evaluation ( $n = 4$  per group), (E) *Pgc1 $\alpha$*  mRNA levels (Fold) ( $n = 4$  per group) and (F) representative histograms relative to Mitotracker RED CMXRos fluorescence intensity reported in Figure 5I, in primary OBs.

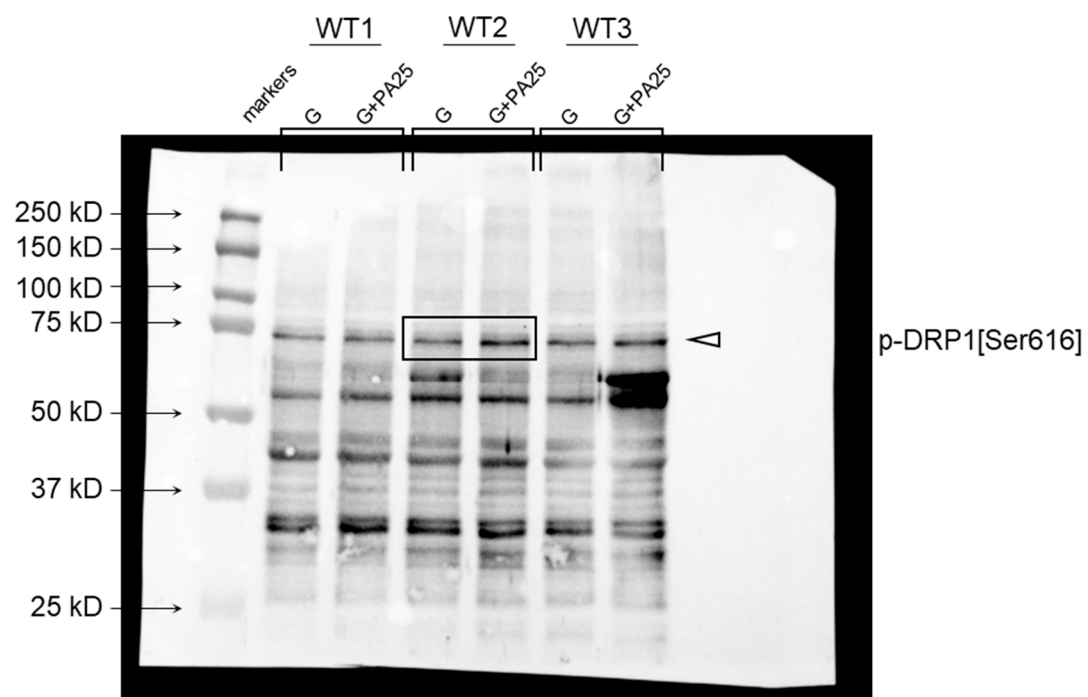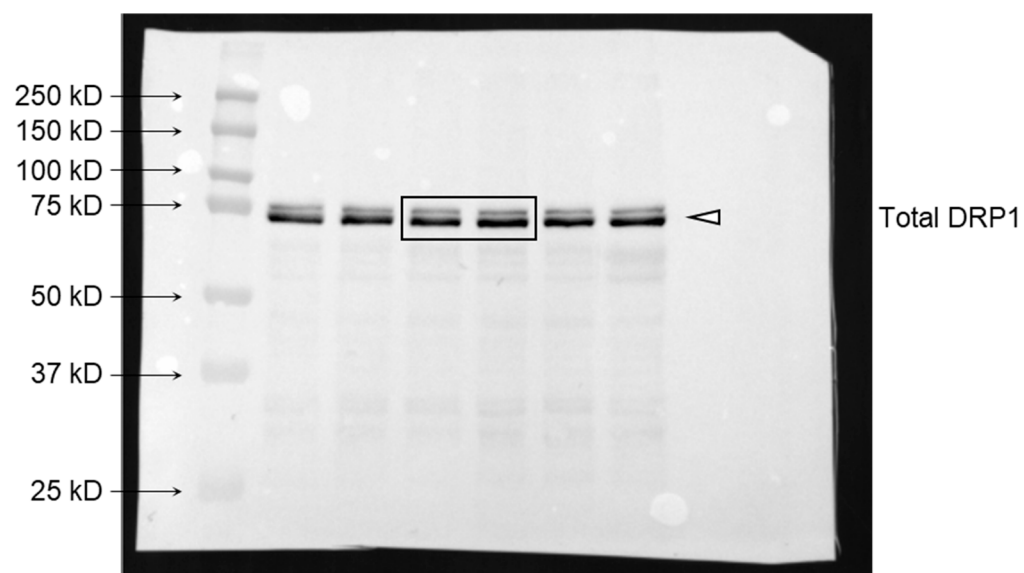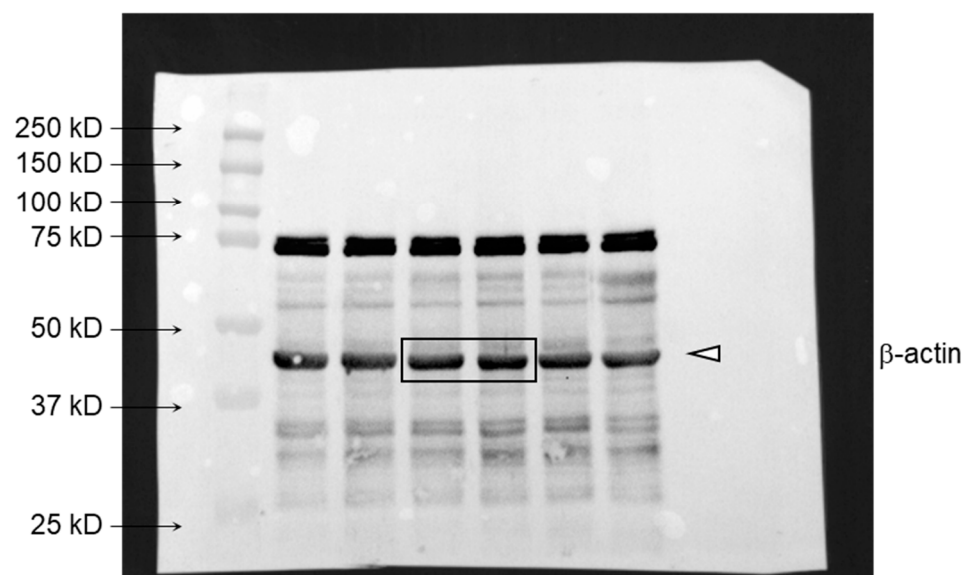

**Supplementary Figure S3.** Representative Western Blot original uncut image (relative to Figure 5L). Representative nitrocellulose membrane image for p-DRP1[Ser616], total DRP1 and  $\beta$ -actin determination in osteogenic-induced pOBs, derived from  $n = 3$  animal samples (Wild type, WT C57Bl/6 mice) undergoing G and G+PA25 treatments in culture. The black rectangles identify the cut image reported in the main text in Figure 5L.
